# Supplementary material for: A novel tetravalent bispecific TandAb (CD30/CD16A) efficiently recruits NK cells for the lysis of CD30+ tumor cells
Source: PubMed Central journal article supplement — MAbs. 2014 Mar 26;6(3):727–38. doi: 10.4161/mabs.28591 (PMC4011917; doi:10.4161/mabs.28591), 2014-03-26
Supplement: mabs-6-727-s01.pdf [file mabs-6-727-s01.pdf]

## **Supplemental Material to:**

**Uwe Reusch, Carmen Burkhardt, Ivica Fucek, Fabrice Le Gall, Mikaelle Le Gall, Karin Hoffmann, Stefan HJ Knackmuss, Sergej Kiprijanov, Melvyn Little and Eugene A Zhukovsky**

**A novel tetravalent bispecific TandAb (CD30/CD16A) efficiently recruits NK cells for the lysis of CD30+ tumor cells**

**mAbs 2014; 6(3)**

**<http://dx.doi.org/10.4161/mabs.28591>**

**[www.landesbioscience.com/journals/mabs/article/28591/](http://www.landesbioscience.com/journals/mabs/article/28591/)**

**Figure 1S: Amino acid sequence of the V<sub>H</sub> and V<sub>L</sub> of the anti-CD16A clone LSIV21.**

**Figure 2S: SDS-PAGE and SE-HPLC of CD30/CD16A TandAb.** (A) Reducing and non-reducing SDS-PAGE. Determination of the apparent molecular weight of CD30/CD16A TandAb (2 µg per lane) was performed under reducing and non-reducing conditions in 10% Tricine SDS-PAGE and subsequent staining with the NuPAGE Colloidal Blue Staining Kit (Invitrogen, catalog number LC6025). Molecular weight marker Mark12 unstained standard (Invitrogen, catalog number LC5677) was used to estimate TandAb mass. The main protein species, with an apparent molecular weight of approximately 50 kDa, represents the monomeric polypeptide of the CD30/CD16A TandAb. (B) Analysis of CD30/CD16A TandAb homodimer, aggregates and fragment by SE-HPLC. CD30/CD16A TandAb preparations were analyzed on a Superdex 200 column employing 40 mM Na<sub>2</sub>HPO<sub>4</sub>, pH 7.0 buffer as the mobile phase at a flow rate of 0.5 mL/min with a HPLC system (Agilent HP1100/HP1200). The results from the SE-HPLC revealed a purity of the CD30/CD16A TandAb of 96.2% homodimer. The content of aggregates was reported as 3.8%.

**Figure 3S: Kinetics of target cell lysis mediated by CD30/CD16A TandAb, diabody, anti-CD30 IgG and Fc-enhanced anti-CD30 IgG in cytotoxicity assays.** 1x10<sup>4</sup> calcein-labeled KARPAS-299 target cells were incubated for the indicated time periods with increasing concentrations of CD30/CD16A TandAb, CD30/CD16A diabody, anti-CD30 IgG and Fc-enhanced anti-CD30 IgG together with freshly isolated human NK cells at an E:T ratio of 5:1. Percent specific target cell lysis was calculated from the fluorescent calcein released into the cell culture supernatant from apoptotic target cells and plotted as mean and

SD of duplicates in the diagram together with the sigmoidal-dose response curves determined by non-linear regression.

**Figure 1S**

V<sub>H</sub>:

QVQLVQSGAEVKKPGESLKVSCKASGYTFTSYMHWRQAPGQGLEWMGIINPSGG  
STSYAQKFGQGRVTMTRDTSTSTVYMESSLRSEDTAVYYCARGSAYYYDFADYWGQ  
GTLVTVSS

V<sub>L</sub>:

SYVLTQPSSVSVAPGQTATISCGGHNIGSKNVHWYQQRPGQSPVLVIYQDNKRPSGIP  
ERFSGSNSGNTATLTISGTQAMDEADYYCQVWDNYSVLFGGGTKLTVL

**Figure 2S**

**A**

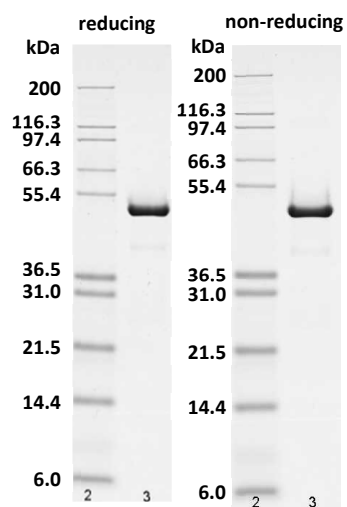

**B**

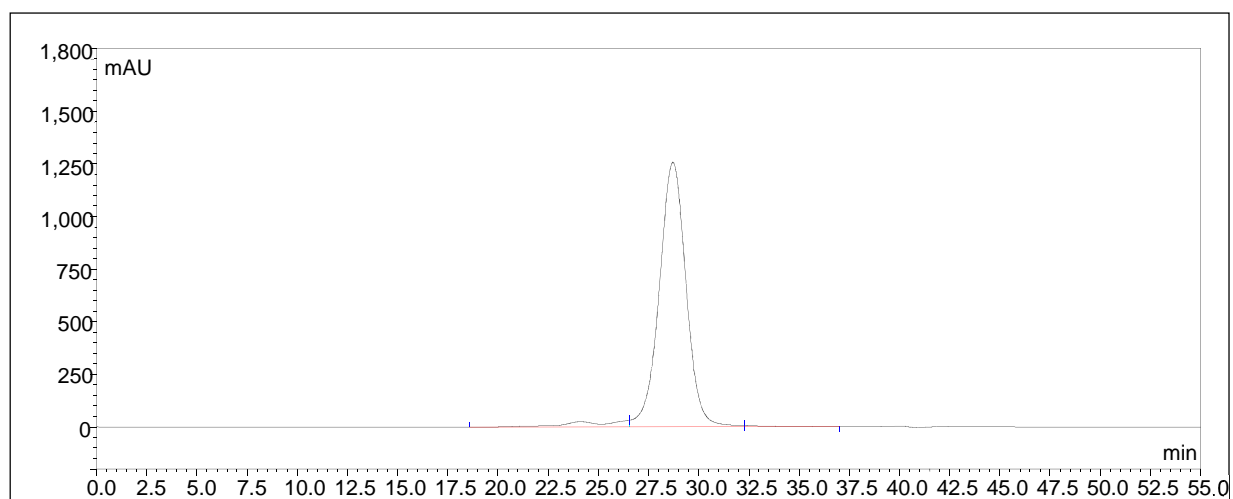

Figure 3S

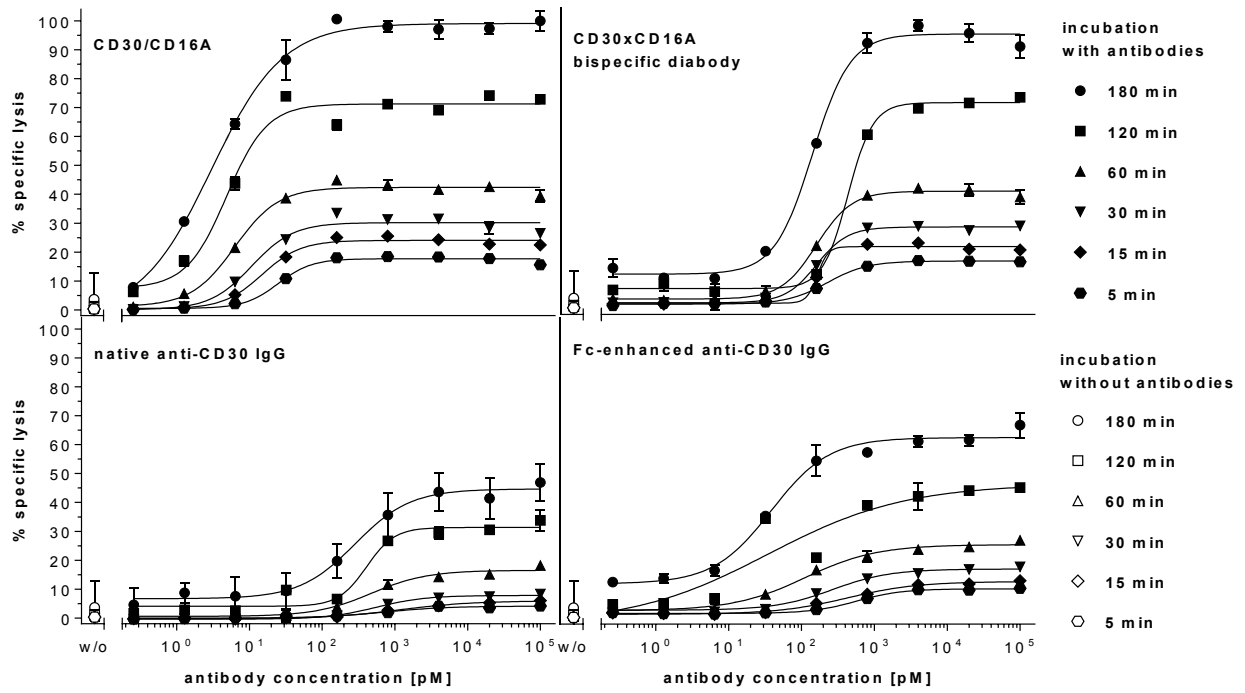

**SUPPLEMENTARY Table 1S: Affinities of parental and affinity-matured anti-CD16A scFv**

| anti-CD16A scFv clone |         | K <sub>D</sub> [nM] |
|-----------------------|---------|---------------------|
| parental              | 50NI    | 14423               |
| affinity<br>matured   | LSIII49 | 651                 |
|                       | LBIII3  | 2406                |
|                       | LBIII5  | 913                 |
|                       | LBIII6  | 501                 |
|                       | LSIV14  | 594                 |
|                       | LSIV21  | 393                 |
